# Supplementary material
Source: PubMed Central journal article supplement (PMC2695113)
Supplement: 0903103106_0903103106SI.pdf [file 0903103106_0903103106SI.pdf]

# Supporting Information

Hindorff et al. 10.1073/pnas.0903103106

## SI Text

**Catalog Curation.** Weekly PubMed searches were done using the terms “genome-wide’ OR ‘genome AND identification’ OR ‘genome AND association,’” with limits on the current year and human status. Articles and all available supporting information were downloaded. Studies focusing on copy number variants (CNV) were included in the catalog but known to be incomplete. Future efforts will focus on more completely ascertaining studies of CNVs.

Information was extracted on each study and each SNP as described in *Summary of Data Available in the NHGRI GWAS Catalog*. If the *p* value, OR, and 95% CI fields were not available for the combined population, we extracted estimates from the population group with the largest sample size. In extracting information, we followed these additional guidelines: missing or nonapplicable fields were denoted as follows: ?, allele not reported; NS, not significant (no associations at  $p < 1 \times 10^{-5}$  were identified); NR, not reported. Where multiple genetic models were available, we prioritized effect sizes (ORs, variance proportions, increments) as follows: (i) genotypic model, per allele estimate; (ii) genotypic model, heterozygote estimate, (iii) allelic model, allelic estimate. Focusing on risk alleles, we inverted ORs  $< 1$  and their associated confidence intervals, and reported the opposite allele if available. If 95% CI were not published, we estimated them using standard errors where available (1). If more than one TAS within a gene met the above criteria, we reported one TAS unless there was evidence for an independent association. Associations attributed to a combination of one or more genetic variants were denoted as such in the rs number column (e.g., “rs1015362-G + rs4911414-T,” “3-SNP haplotype 1”). If available, rs numbers for SNPs comprising the haplotype were indexed so that they would be searchable using the SNP search features described below. Genes attributed to a TAS were extracted verbatim from the published report; “intergenic” and “NR” (not reported) were used to denote a location which was not attributed to a particular gene (if it appeared that a gene was sought) or an absence of reporting on location information, respectively. The term “pending” was used to identify an eligible GWAS for which TAS information had not yet been extracted; studies of CNVs, which are known to be incompletely ascertained, are also noted as pending. We characterized the strength of the associations by per allele (additive) ORs for discrete traits and percent of variance explained or standard deviation increment per risk allele for quantitative traits.

To facilitate use of the catalog, we implemented several search features including journal title, first author (last name), disease/trait (string search or multiple option search), chromosomal region, reported gene name, SNP (rs number), OR (greater than a user-defined threshold), and *p* value (less than a user-defined threshold). The catalog data can also be downloaded as an Excel file.

**Descriptive and Association Analyses.** SNP allele frequencies for the three original HapMap populations were extracted from HapMart (<http://www.hapmap.org/hapmart.html>). Genomic annotations were extracted using the University of California Santa Cruz Genome Browser (<http://genome.ucsc.edu/cgi-bin/hgGateway>). For the 10 associations in 5 papers that involved haplotypes or combinations of SNPs, we reported allele frequency and functional information only for the SNP with the most compelling functional annotation (nonsynonymous > syn-

onymous/UTR > intronic > intergenic/near gene). Reported genes were extracted solely from the authors’ published report; no attempt was made to standardize this information across papers using standard annotations or databases.

A trait was defined as discrete if the study design recruited participants or reported results based on presence or absence of the trait (e.g., case control status) or if a quantitative trait was dichotomized into 2 categories (e.g., skin pigmentation score above/below a certain threshold). For SNP-trait association analyses where the same SNP-trait combination was reported in multiple publications, we only included effect size and allele frequency information from the publication with the largest total sample size (85 associations excluded). We also identified instances in which reported genes harboring one or more TASs significant at  $p < 5 \times 10^{-8}$  were observed in multiple reports or for multiple traits within a single report and determined whether the traits were very similar (such as body mass index and waist circumference) or seemingly distinct (such as type 1 diabetes and multiple sclerosis) based on our own judgment.

**Analysis of Enrichment/Depletion in Annotation Sets.** To compute the odds of a TAS block mapping to a particular annotation set (i.e., odds of at least one TASP within an LD block occurring in a particular annotation set), we mapped all TASP onto the annotation set, counted the number of unique LD blocks (defined by the chosen  $r^2$  threshold) with at least one mapped TASP, and divided by the number of LD blocks without any mapped TASP. To assay for depletion or enrichment of TAS blocks in a particular annotation set, we first computed the odds of a randomly selected LD block mapping to the annotation set (i.e., odds of at least one SNP from a randomly selected LD block occurring in the annotation set). Specifically, we generated 100 random collections of SNPs where each collection’s size was equal to the number of TASs and performed the following for each collection: expanded the collection by including LD partners from HapMap phase II data, mapped them onto the annotation set, counted the number of unique LD blocks with at least one mapped SNP and divided by the number of LD blocks without any mapped SNPs. We computed the expected odds by averaging across the 100 collections. We then computed the significance of the observed odds relative to this expected odds (through OR and two-tailed Fisher’s Exact Test *p* value calculations). As the SNP arrays used in the various published GWAS may harbor substantial representational biases (e.g., the Illumina HumanHap300 platform includes a specific bias toward nonsynonymous sites), we generated the random collections of SNPs for the control dataset by drawing from SNP genotyping arrays according to the same distribution from which the TASs were identified. The genotyping platforms used in published GWAS and the percentage of TASs with  $p < 5 \times 10^{-8}$  from each are provided here: Affymetrix 100K (4%), Affymetrix 250K (0.2%), Affymetrix 500K (20%), Affymetrix 5.0 (1%), Affymetrix 10K + 500K (0.9%), Affymetrix 100K + 500K (0.2%), Affymetrix 5.0 + 500K (0.4%), Affymetrix 6.0 + 500K (0.2%), Illumina 300K (33%), Illumina 550K (14%), Illumina 300K + 550K (0.9%), Affymetrix 500K + Illumina 300K (7%), Affymetrix 500K + Illumina 550K (0.6%), HapMap (16%) and Perlegen (2%).

**Analysis of Deleterious Nonsynonymous TASs.** The program PolyPhen (2) was used to determine whether a nonsynonymous TASP or control SNP was likely deleterious using predictions of whether one of the alleles has a benign, unknown, possibly

damaging or probably damaging effect on protein structure. We repeated the enrichment analysis using only nonsynonymous SNPs predicted by PolyPhen to be possibly or probably damaging. To provide a list of all possible deleterious nonsynonymous TASPs, we combined those predicted by PolyPhen with those predicted by a novel, unpublished method, CDPred (P. Cherukuri and J. Mullikin, personal communication). CDPred assigns a “d-score” (deleterious score) for each nonsynonymous SNP. The d-score ranges from +20 (completely benign) to -30 (nonsense or frameshift) and  $\leq -3$  is considered deleterious.

#### Positive Selection Analysis via Integrated Haplotype Scoring (iHS).

Integrated haplotype scores for all HapMap Phase II CEU SNPs were downloaded from <http://hg-wen.uchicago.edu/selection/haplotter.htm>. This method assigns an iHS for every HapMap Phase II SNP by measuring the differential extent of regional LD between the 2 alleles. To identify reported TASs under positive selection, we first selected one TAS per  $r^2 > 0.6$  LD block. We then computed the number of such TASs with an iHS  $> 1.635$  (which corresponds to the 90th percentile among HapMap Phase II CEU SNPs). We compared this number with the “expected” number (computed by averaging the number of randomly selected TASs with an iHS  $> 1.635$  in each of the 100 control sets previously described) to compute the OR and  $p$  value.

**Summary of Data Available in the NHGRI GWAS Catalog ([www.genome.gov/gwastudies](http://www.genome.gov/gwastudies)).** Studies eligible for inclusion attempted to assay at least 100,000 SNPs in the initial design, excluding studies focusing only on candidate genes.

#### Study Level Information.

- Citation [last name of first author, title, journal, online or in print publication date (whichever was first), and HTML link to PubMed record]

1. Rosner B, ed. (1995) *Fundamentals of Biostatistics* (Wadsworth Publishing Company, Belmont, CA).

- Trait/disease
- Initial sample size (summing across multiple Stage 1 populations, if applicable)
- Replication sample size (summing across all reported replication attempts)
- Genotyping platform manufacturer
- Number of SNPs passing quality control filters [using “up to (maximum number of SNPs)” if multiple platforms were used without imputation, the total number of imputed SNPs, or “pooled” to denote studies of pooled DNA, as applicable]
- Copy number variant study (initially excluded; additional studies to be added)

#### SNP-Trait Association Level Information.

- dbSNP reference number (rs number)
- Chromosomal region (extracted from University of California Santa Cruz Genome Browser)
- Gene(s) (as reported by authors)
- Risk allele
- Risk allele frequency in controls (if not available among all controls, among the control group with the largest sample size)
- $p$  value and any relevant text (e.g., subgroups where applicable)
- Odds ratio, percent of variance explained, or increment size associated with risk allele, where specified, and 95% CI

#### Search Features.

- Journal title
- First author (last name)
- Disease/trait (2 options—string search or select multiple terms)
- Chromosomal region
- Reported gene name
- SNP (rs number)
- Odds ratio (greater than a user-defined threshold)
- $p$  value (less than a user-defined threshold)

2. Ramensky V, Bork P, Sunyaev S (2002) Human non-synonymous SNPs: Server and survey. *Nucleic Acids Res* 30:3894–3900.

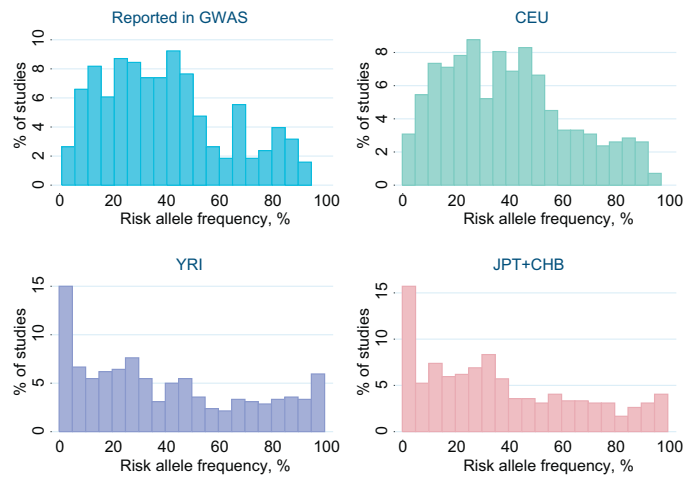

Fig. S1. Risk allele frequencies in published reports and HapMap populations.

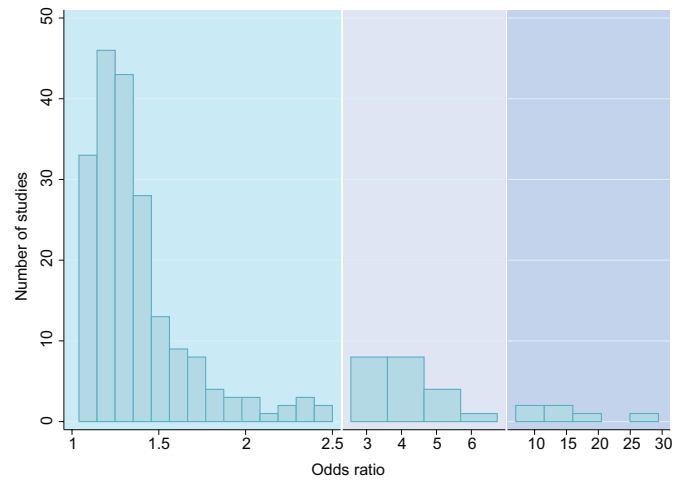

**Fig. S2.** Distribution of OR for discrete traits. Odds ratio thresholds indicate inclusive upper bound of each interval. Note the discontinuous x axis resulting from the juxtaposition of histograms of the following distributions: light blue,  $1 < OR \leq 2.5$ ; lavender,  $2.5 < OR \leq 7$ ; purple,  $OR > 7$ .

Enrichment/depletion analysis without adjusting for 'hitchhiking' effects from non-synonymous sites

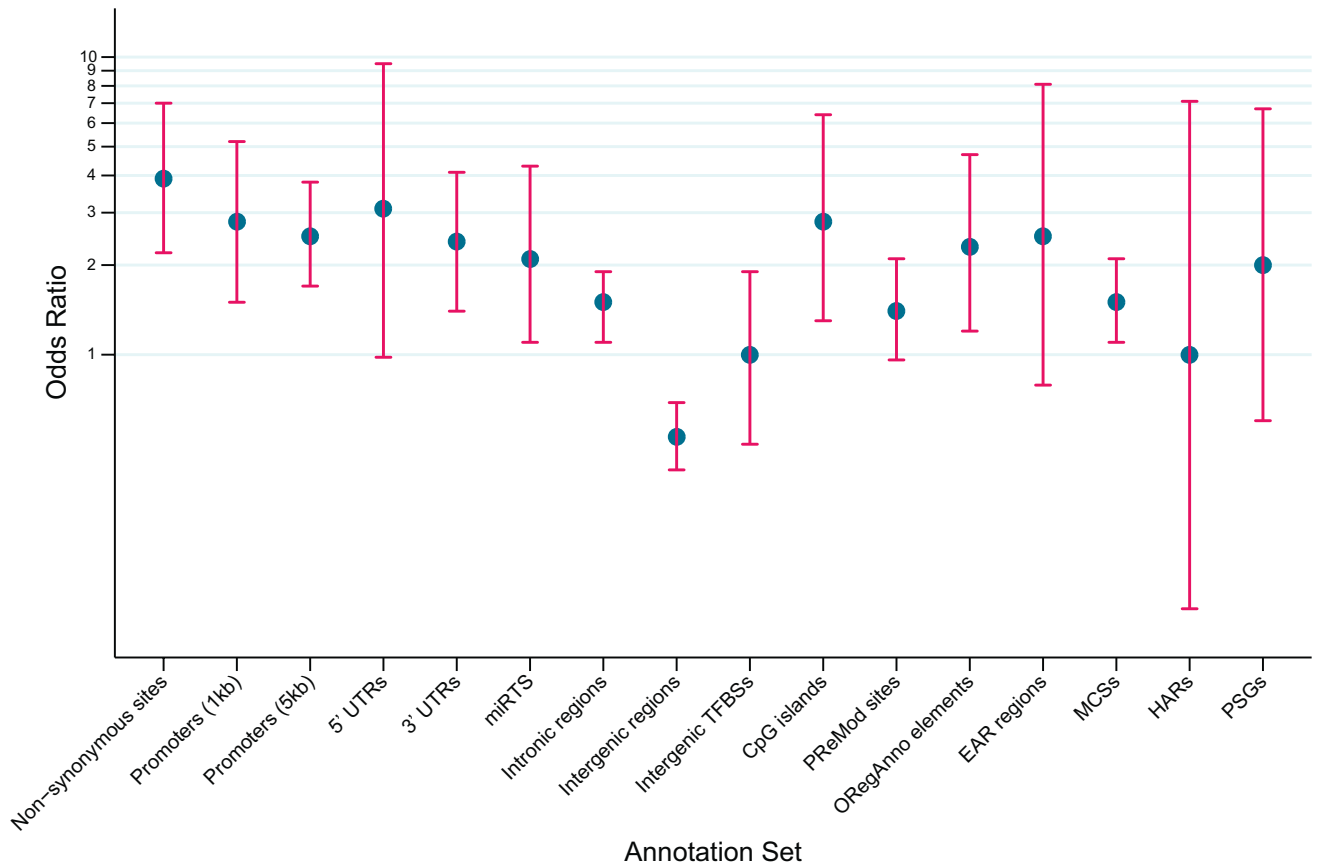

**Fig. S3.** ORs for TAS block enrichment/depletion analysis without adjusting for "hitchhiking" effects from nonsynonymous sites. Four annotation sets (Splice sites, Validated enhancers, EvoFold elements, and noncoding RNAs) are not represented here as their ORs are zero. The blue circle represents the point estimate of the OR and the red lines represent the 95% CI. For an explanation of each of the annotation sets on the x axis, please see [Table S3](#). This analysis does not exclude any of the "hitchhiking" TASP (those that are in  $r^2 > 0.6$  with any nonsynonymous HapMap phase II CEU SNPs).

**Table S1. Descriptive characteristics of the 151 GWAS publications and 531 associations included in the analysis**

|                                   | Characteristic                                   | N (%) <sup>†</sup>    |
|-----------------------------------|--------------------------------------------------|-----------------------|
| Study publications (N = 151)*     | Median combined <sup>‡</sup> sample size (range) | 7,858<br>(146–91,479) |
|                                   | Publication year                                 |                       |
|                                   | 2005                                             | 1 (1)                 |
|                                   | 2006                                             | 3 (2)                 |
|                                   | 2007                                             | 54 (36)               |
|                                   | 2008                                             | 93 (62)               |
| SNP-trait associations (N = 531)* | Replication sample reported                      | 130 (86)              |
|                                   | Median risk allele frequency, % (IQR)            | 36 (21–53)            |
|                                   | Median odds ratio, % (IQR)                       | 1.33 (1.20–1.61)      |
|                                   | Associated with discrete outcome <sup>§</sup>    | 227 (43)              |
|                                   | Associated with quantitative trait <sup>‡</sup>  | 304 (57)              |
|                                   | p-value                                          |                       |
|                                   | <5 × 10 <sup>-8</sup> and ≥ 10 <sup>-9</sup>     | 136 (26)              |
|                                   | <10 <sup>-9</sup> and ≥ 10 <sup>-10</sup>        | 64 (12)               |
|                                   | <10 <sup>-10</sup> and ≥ 10 <sup>-20</sup>       | 215 (40)              |
| <10 <sup>-20</sup>                | 116 (22)                                         |                       |

\*Meeting a threshold of  $p < 5 \times 10^{-8}$ .

<sup>†</sup>Characteristics are reported as numbers (%), unless otherwise noted.

<sup>‡</sup>Combined across initial and replication sample sizes.

<sup>§</sup>A single TAS could be associated with both a quantitative and discrete trait.

**Table S2. Number of independent reported SNP-trait associations at  $p < 5 \times 10^{-8}$ , most prevalent diseases. Only traits for which prevalence data for adults or an age-standardized population were available are reported. Traits for which prevalence data were only available in a limited subset of individuals (e.g., >65 years old) were excluded. Unless otherwise noted, prevalence rates are given for the adult (>18 years old) population. Number of independent associations refers to the number of SNP associations with each trait across all loci and publications (includes multiple SNPs published within the same paper and the same SNP reported in multiple publications); SNPs with  $r^2 > 0.8$  were not considered independent. "Obesity" includes studies of BMI, weight and obesity**

| Disease/trait                    | Prevalence (per 10,000) | Number of independent reported associations | Prevalence source                                                                                                                                                                                                                                                  |
|----------------------------------|-------------------------|---------------------------------------------|--------------------------------------------------------------------------------------------------------------------------------------------------------------------------------------------------------------------------------------------------------------------|
| Obesity                          | 3,140*                  | 19                                          | National Institute of Diabetes and Digestive and Kidney Diseases weight control information network: <a href="http://www.win.niddk.nih.gov/statistics/#preval">http://www.win.niddk.nih.gov/statistics/#preval</a>                                                 |
| Coronary disease                 | 730                     | 4                                           | American Heart Association: <a href="http://www.americanheart.org/downloadable/heart/1200078608862HS_Stats%202008.final.pdf">http://www.americanheart.org/downloadable/heart/1200078608862HS_Stats%202008.final.pdf</a>                                            |
| Gallstones                       | 710                     | 1                                           | (1)                                                                                                                                                                                                                                                                |
| Restless legs syndrome           | 700                     | 6                                           | (2)                                                                                                                                                                                                                                                                |
| Type 2 diabetes                  | 530                     | 21                                          | Centers for Disease Control: <a href="http://www.cdc.gov/diabetes/statistics/prev/national/figage.htm">http://www.cdc.gov/diabetes/statistics/prev/national/figage.htm</a>                                                                                         |
| Myocardial infarction            | 400                     | 2                                           | Centers for Disease Control: <a href="http://www.cdc.gov/mmwr/preview/mmwrhtml/mm5606a2.htm#tab1">http://www.cdc.gov/mmwr/preview/mmwrhtml/mm5606a2.htm#tab1</a>                                                                                                   |
| Bipolar disorder                 | 260                     | 2                                           | National Institute of Mental Health: <a href="http://www.nimh.nih.gov/health/publications/the-numbers-count-mental-disorders-in-america.shtml#Bipolar">http://www.nimh.nih.gov/health/publications/the-numbers-count-mental-disorders-in-america.shtml#Bipolar</a> |
| Stroke                           | 260                     | 1                                           | American Heart Association, 2008 update. <a href="http://www.americanheart.org/downloadable/heart/1200078608862HS_Stats%202008.final.pdf">http://www.americanheart.org/downloadable/heart/1200078608862HS_Stats%202008.final.pdf</a>                               |
| Psoriasis                        | 220                     | 3                                           | National Psoriasis Foundation: <a href="http://www.psoriasis.org/about/stats/">http://www.psoriasis.org/about/stats/</a>                                                                                                                                           |
| Prostate cancer                  | 163                     | 18                                          | Surveillance, Epidemiology, and End Results (SEER) Program ( <a href="http://www.seer.cancer.gov">www.seer.cancer.gov</a> ): Nov. 2007 data submission                                                                                                             |
| Age-related macular degeneration | 147                     | 1                                           | (3)                                                                                                                                                                                                                                                                |
| Breast cancer                    | 140                     | 8                                           | Surveillance, Epidemiology, and End Results (SEER) Program ( <a href="http://www.seer.cancer.gov">www.seer.cancer.gov</a> ): Nov. 2007 data submission                                                                                                             |
| Rheumatoid arthritis             | 60                      | 10                                          | Centers for Disease Control: <a href="http://www.cdc.gov/arthritis/arthritis/rheumatoid.htm#2">http://www.cdc.gov/arthritis/arthritis/rheumatoid.htm#2</a>                                                                                                         |
| Male-pattern baldness            | 54                      | 3                                           | (4)                                                                                                                                                                                                                                                                |

\*Among adults > 20 years old.

1. Everhart JE, Khare M, Hill M, Maurer KR (1999) Prevalence and ethnic differences in gallbladder disease in the United States. *Gastroenterology* 117:632–639.
2. Zucconi M, Ferini-Strambi L (2004) Epidemiology and clinical findings of restless legs syndrome. *Sleep Medicine* 5:293–299.
3. Friedman DS, et al. (2004) Prevalence of age-related macular degeneration in the United States. *Arch Ophthalmol* 122:564–572.
4. Otberg N, Finner AM, Shapiro J (2007) Androgenetic alopecia. *Endocrinol Metab Clin North Am* 36:379–398.



**Table S3. Comparison of selected associations reported using candidate gene and genome-wide association methods. Examples of well-characterized candidate loci were identified from Hirschhorn et al. (1); Glazier et al. (2); Ioannidis et al. (3); McCarthy and Zeggini (4). Estimates from candidate gene studies were preferentially extracted from meta-analyses where available and are presented in terms of the risk allele. If more than one candidate SNP within the specified gene was well-characterized, the association with the lowest p-value is presented**

| Candidate locus       | Trait                        | Candidate gene association          |                      |           | Genome-wide association               |                      |                                |
|-----------------------|------------------------------|-------------------------------------|----------------------|-----------|---------------------------------------|----------------------|--------------------------------|
|                       |                              | Estimate <sup>†</sup> (95% CI)      | p-value              | Reference | Estimate <sup>†</sup> (95% CI)        | p-value              | Reference*                     |
| <i>ADAM33</i>         | Asthma                       | 1.46 [1.21–1.76]                    | $3 \times 10^{-4}$   | (5)       | No reported associations.             |                      |                                |
| <i>APOE</i>           | Alzheimer's disease          | 1.43 [1.3–1.57]                     | $<1 \times 10^{-8}$  | (6)       | 4.01 (NR)                             | $1 \times 10^{-39}$  | (7)                            |
|                       |                              |                                     |                      |           | NR                                    | $2 \times 10^{-44}$  | (8)                            |
|                       | Lipids <sup>‡</sup>          | 44.0 [33.6–51.1] mg/dL higher LDL-C | NR                   | (10)      | NR                                    | $1 \times 10^{-39}$  | (9)                            |
|                       |                              | 31% [23%–38%] higher LDL-C          |                      |           | 0.19% [0.15% - 0.23%] SD higher LDL-C | $1 \times 10^{-60}$  | (11)                           |
|                       |                              |                                     |                      |           | 6.61 (NR) mg/dl higher LDL-C          | $3 \times 10^{-43}$  | (12)                           |
| <i>CARD15 / NOD2</i>  | Crohn's Disease <sup>§</sup> | 2.4 [1.4–4.3]                       | $3.8 \times 10^{-4}$ | (13)      | 3.99 [NR]                             | $3 \times 10^{-24}$  | (14)                           |
|                       |                              |                                     |                      |           | 1.46 [1.29–1.64]                      | $4 \times 10^{-10}$  | (15)                           |
| <i>CCR5</i>           | HIV progression              | 1.35 [1.03–1.79]                    | NR                   | (16)      | No reported associations.             |                      |                                |
| <i>CTLA4</i>          | Type 1 diabetes              | 1.45 [1.28–1.65]                    | $< 0.001$            | (17)      | NR                                    | $8 \times 10^{-11}$  | (18)                           |
| <i>F5</i>             | Venous thrombosis            | 4.24 [3.42–5.26]                    | $< 0.001$            | (19)      | Trait not in GWAS catalog             |                      |                                |
| <i>GSTM1</i>          | Lung cancer                  | 1.18 [1.14–1.23]                    | $< 0.01$             | (20)      | No reported associations.             |                      |                                |
| <i>HLA/MHC region</i> | Type 1 diabetes              | 4.0 [NR]                            | $< 0.0001$           | (21)      | 8.30 [6.97 - 9.89]                    | $1 \times 10^{-16}$  | (22)                           |
|                       |                              |                                     |                      |           | 5.49 [4.83 - 6.24]                    | $5 \times 10^{-134}$ | (23)                           |
| <i>KCNJ11</i>         | Type 2 diabetes              | 1.23 [1.12–1.36]                    | $1.5 \times 10^{-5}$ | (24)      | 1.16 [1.09–1.23]                      | $4 \times 10^{-7}$   | (25)                           |
|                       |                              |                                     |                      |           | 1.14 [1.10–1.19]                      | $7 \times 10^{-11}$  | FUSION/WTCCC/DGI, 2007 (26–28) |
| <i>MTHFR</i>          | Colorectal cancer            | 1.20 [1.08–1.33] (homozygote)       | 0.001                | (29)      | No reported associations.             |                      |                                |
| <i>PPARG</i>          | Type 2 diabetes              | 1.27 [NR]                           | $< 2 \times 10^{-8}$ | (30)      | 1.15 [1.10–1.21]                      | $2 \times 10^{-7}$   | (25)                           |
|                       |                              |                                     |                      |           | 1.14 [1.08–1.20]                      | $2 \times 10^{-6}$   | FUSION/WTCCC/DGI, 2007 (26–28) |
| <i>PRNP</i>           | Creutzfeldt-Jakob disease    | 2.86 [1.10–7.48]                    | 0.03                 | (31)      | Trait not in GWAS catalog             |                      |                                |

NR, not reported; LDL-C, low density lipoprotein cholesterol.

\*For ease of presentation, only selected GWAS findings are presented. A full listing can be found at [www.genome.gov/gwastudies](http://www.genome.gov/gwastudies).

<sup>†</sup>Unless otherwise reported, effect sizes are odds ratios.

<sup>‡</sup>Includes triglycerides, LDL cholesterol

<sup>§</sup>Also includes irritable bowel syndrome, inflammatory bowel disease.

- Hirschhorn JN, Lohmueller K, Byrne E, Hirschhorn K (2002) A comprehensive review of genetic association studies. *Genet Med* 4: 45–61.
- Glazier AM, Nadeau JH, Aitman TJ (2002) Finding genes that underlie complex traits. *Science* 298: 2345–2349.
- Ioannidis JP, et al. (2006) A road map for efficient and reliable human genome epidemiology. *Nat Genet* 38: 3–5.
- McCarthy MI, Zeggini E (2006) Genetics of type 2 diabetes. *Curr Diab Rep* 6: 147–154.
- Contopoulos-Ioannidis DG, Kouri IN, Ioannidis JP (2007) Genetic predisposition to asthma and atopy. *Respiration* 74: 8–12.
- Grupe A, et al. (2007) Evidence for novel susceptibility genes for late-onset Alzheimer's disease from a genome-wide association study of putative functional variants. *Hum Mol Genet* 16: 865–873.
- Coon KD, et al. (2007) A high-density whole-genome association study reveals that APOE is the major susceptibility gene for sporadic late-onset Alzheimer's disease. *J Clin Psychiatry* 68: 613–618.
- Li H, et al. (2008) Candidate single-nucleotide polymorphisms from a genomewide association study of Alzheimer disease. *Arch Neurol* 65: 45–53.
- Webster JA, et al. (2008) Sor11 as an Alzheimer's disease predisposition gene? *Neurodegener Dis* 5: 60–64.
- Bennet AM, et al. (2007) Association of apolipoprotein E genotypes with lipid levels and coronary risk. *J Am Med Assoc* 298: 1300–1311.
- Kathiresan S, et al. (2008) Six new loci associated with blood low-density lipoprotein cholesterol, high-density lipoprotein cholesterol or triglycerides in humans. *Nat Genet* 40:189–197.
- Willer CJ, et al. (2008) Newly identified loci that influence lipid concentrations and risk of coronary artery disease. *Nat Genet* 40:161–169.
- Oostenbrug LE, et al. (2006) CARD15 in inflammatory bowel disease and Crohn's disease phenotypes: an association study and pooled analysis. *Dig Liver Dis* 38: 834–845.
- Barrett JC, et al. (2008) Genome-wide association defines more than 30 distinct susceptibility loci for Crohn's disease. *Nat Genet* 40: 955–962.
- Kugathasan S, et al. (2008) Loci on 20q13 and 21q22 are associated with pediatric-onset inflammatory bowel disease. *Nat Genet* 40: 1211–1215.
- Ioannidis JP, Ntzani EE, Trikalinos TA, Contopoulos-Ioannidis DG (2001) Replication validity of genetic association studies. *Nat Genet* 29: 306–309.
- Kavvoura FK, Ioannidis JP (2005) CTLA-4 gene polymorphisms and susceptibility to type 1 diabetes mellitus: A HuGE Review and meta-analysis. *Am J Epidemiol* 162: 3–16.
- Cooper JD, et al. (2008) Meta-analysis of genome-wide association study data identifies additional type 1 diabetes risk loci. *Nat Genet* 40: 1399–1401.
- Bezemer ID, et al. (2008) Gene variants associated with deep vein thrombosis. *J Am Med Assoc* 299: 1306–1314.
- Ye Z, et al. (2006) Seven haemostatic gene polymorphisms in coronary disease: Meta-analysis of 66,155 cases and 91,307 controls. *Lancet* 367: 651–658.
- Dorman JS, Bunker CH (2000) HLA-DQ locus of the human leukocyte antigen complex and type 1 diabetes mellitus: A HuGE review. *Epidemiol Rev* 22: 218–227.
- Hakonarson H, et al. (2007) A genome-wide association study identifies KIAA0350 as a type 1 diabetes gene. *Nature* 448: 591–594.
- Wellcome Trust Case Control Consortium (2007) Genome-wide association study of 14,000 cases of seven common diseases and 3,000 shared controls. *Nature* 447: 661–678.
- Gloyn AL, et al. (2003) Large-scale association studies of variants in genes encoding the pancreatic beta-cell KATP channel subunits Kir6.2 (*KCNJ11*) and SUR1 (*ABCC8*) confirm that the *KCNJ11* E23K variant is associated with type 2 diabetes. *Diabetes* 52: 568–572.
- Zeggini E, et al. (2008) Meta-analysis of genome-wide association data and large-scale replication identifies additional susceptibility loci for type 2 diabetes. *Nat Genet* 40: 638–645.
- Saxena R, et al. (2007) Genome-wide association analysis identifies loci for type 2 diabetes and triglyceride levels. *Science* 316: 1331–1336.
- Scott LJ, et al. (2007) A genome-wide association study of type 2 diabetes in Finns detects multiple susceptibility variants. *Science* 316: 1341–1345.
- Zeggini E, et al. (2007) Replication of genome-wide association signals in UK samples reveals risk loci for type 2 diabetes. *Science* 316: 1336–1341.
- Hubner RA, Houlston RS (2007) MTHFR C677T and colorectal cancer risk: A meta-analysis of 25 populations. *Int J Cancer* 120: 1027–1035.
- Florez JC, Hirschhorn J, Altshuler D (2003) The inherited basis of diabetes mellitus: implications for the genetic analysis of complex traits. *Annu Rev Genomics Hum Genet* 4: 257–291.
- Croes EA, et al. (2004) Polymorphisms in the prion protein gene and in the doppel gene increase susceptibility for Creutzfeldt-Jakob disease. *Eur J Hum Genet* 12: 389–394.



**Table S4. Description of annotation sets and frequency of TAS blocks mapping to them**

| Annotation set   | Description                                                                                                | Source                                                                                                                                                                | Frequency (n, %) of TAS blocks* | Frequency of Random LD blocks* |
|------------------|------------------------------------------------------------------------------------------------------------|-----------------------------------------------------------------------------------------------------------------------------------------------------------------------|---------------------------------|--------------------------------|
| Non-synonymous   | Genomic positions wherein a nucleotide substitution would cause an amino acid replacement                  | dbSNP version 129                                                                                                                                                     | 57, 12.2%                       | 15.8, 3.5%                     |
| Promoters (1kb)  | 1kb regions upstream of annotated transcription start sites                                                | Ensembl v49 release at <a href="http://www.ensembl.org">www.ensembl.org</a>                                                                                           | 26, 5.5%                        | 8.8, 1.9%                      |
| Promoters (5kb)  | 5kb regions upstream of annotated transcription start sites                                                | Ensembl v49 release at <a href="http://www.ensembl.org">www.ensembl.org</a>                                                                                           | 65, 13.9%                       | 30.3, 6.7%                     |
| 5' UTR           | 5' untranslated regions                                                                                    | dbSNP version 129                                                                                                                                                     | 7, 1.5%                         | 2.8, 0.6%                      |
| 3' UTR           | 3' untranslated regions                                                                                    | dbSNP version 129                                                                                                                                                     | 28, 6.0%                        | 14.6, 3.2%                     |
| miRTS            | Predicted microRNA target sites (conserved and non-conserved) within 3' UTRs                               | Predicted according to the TargetScan 4.2 algorithm (Grimson et al, 2007). Perl script downloaded from <a href="http://www.targetscan.org/">www.targetscan.org/</a> . | 15, 3.2%                        | 8.1, 1.8%                      |
| Intronic         | Non-coding regions within a gene                                                                           | dbSNP version 129                                                                                                                                                     | 189, 40.3%                      | 183.2, 40.3%                   |
| Splice sites     | Intronic regions that allow for splicing (removing introns and joining exons)                              | dbSNP version 129                                                                                                                                                     | 0, 0%                           | 0.1, 0.02%                     |
| Intergenic       | Non-coding regions outside of genes                                                                        | dbSNP version 129                                                                                                                                                     | 186, 40.0%                      | 276.0, 60.7%                   |
| Intergenic TFBSs | Predicted Human-Mouse-Rat conserved transcription factor binding sites in intergenic regions of the genome | UCSC Table Browser                                                                                                                                                    | 21, 4.5%                        | 20.3, 4.5%                     |
| CpG islands      | Genomics regions that contain a high frequency of CG dinucleotides                                         | UCSC Table Browser                                                                                                                                                    | 10, 2.1%                        | 5.1, 1.1%                      |
| Enhancers        | Experimentally supported enhancer elements                                                                 | Vista Enhancer Browser at <a href="http://enhancer.lbl.gov">enhancer.lbl.gov</a>                                                                                      | 0, 0%                           | 0.42, 0.09%                    |
| PREMod           | Predicted cis-regulatory modules                                                                           | PREMod database at <a href="http://genomequebec.mcgill.ca/PREMod/">genomequebec.mcgill.ca/PREMod/</a>                                                                 | 55, 11.7%                       | 46.4, 10.2%                    |
| ORegAnno         | Open source for Regulatory Annotation (experimentally supported regulatory regions)                        | UCSC Table Browser                                                                                                                                                    | 18, 4.3%                        | 9.2, 2.0%                      |
| EAR              | Encode region Ancestral Repeats                                                                            | UCSC Table Browser                                                                                                                                                    | 7, 1.5%                         | 3.0, 0.7%                      |
| EvoFold          | Conserved RNA secondary structure                                                                          | UCSC Table Browser                                                                                                                                                    | 0, 0%                           | 1.0, 0.2%                      |
| ncRNA            | All types of experimentally supported non-coding RNA                                                       | RNADB at <a href="http://research.imb.uq.edu.au/rnadb/">research.imb.uq.edu.au/rnadb/</a>                                                                             | 0, 0%                           | 0.5, 0.10%                     |
| MCSs             | Most Conserved Sequences across mammalian species                                                          | UCSC Table Browser                                                                                                                                                    | 74, 15.8%                       | 69.7, 15.3%                    |
| HAR              | Regions under accelerated rates of substitution in the human genome                                        | Bird et al, 2007, Pollard et al, 2006 and Prabhakar et al, 2006                                                                                                       | 2, 0.4%                         | 1.1, 0.24%                     |
| PSG              | Gene regions undergoing strong positive selection                                                          | UCSC Table Browser (derived from Kosiol et al, 2008)                                                                                                                  | 3, 0.6%                         | 2.4, 0.5%                      |

\* A TAS block is counted when at least one TASP within the LD block maps to the annotation set. Also, for all annotation sets (except for nonsynonymous) TASPs in  $r^2 > 0.6$  with any nonsynonymous HapMap phase II CEU SNP are excluded from this count.

**Table S5. TASP**s in 1-kb promoter regions with putative allele-specific TF binding affinities. The 4 TASPs in this table are within human proximal promoters (defined as 1 kb upstream of every annotated transcription start site) and are not in even moderate LD [ $r^2 > 0.6$ ] with any nonsynonymous SNP. The allele-specific binding affinities are derived from previous predictions from human promoters (1)

| TASP      | TF(s) predicted to bind reference allele | TF(s) predicted to bind non-reference allele | Downstream gene | Trait/Disease              |
|-----------|------------------------------------------|----------------------------------------------|-----------------|----------------------------|
| rs1077834 | HNF4                                     | —                                            | <i>LIPC</i>     | HDL                        |
| rs573225  | DBP                                      | —                                            | <i>G6PC2</i>    | Fasting plasma glucose     |
| rs7848647 | CBF                                      | —                                            | <i>TNFSF15</i>  | Inflammatory bowel disease |
| rs1420106 | —                                        | PAX-2,GATA-1                                 | <i>IL18RAP</i>  | Celiac disease             |

1. Sethupathy P, Giang H, Plotkin JB, Hannenhalli S (2008) *PLoS ONE* 3: e3137.

**Table S6. Reported TASs potentially under positive selection. Positive selection is assessed according to the integrated haplotype score (iHS). Only reported TASs with  $P < 5 \times 10^{-8}$  and only one TAS per  $r^2 > 0.6$  LD block are included**

| TAS                         | Reported gene         | Trait/disease                              | Putative selected allele (selection level)* | Risk allele |
|-----------------------------|-----------------------|--------------------------------------------|---------------------------------------------|-------------|
| <b>Metabolic disorders</b>  |                       |                                            |                                             |             |
| rs10923931                  | <i>NOTCH2</i>         | T2D <sup>†</sup>                           | Ancestral (strong)                          | Derived     |
| rs4402960                   | <i>IGF2BP2</i>        | T2D                                        | Ancestral (moderate)                        | Derived     |
| rs492602                    | <i>FUT2</i>           | Vitamin B12                                | Ancestral (strong)                          | Ancestral   |
| rs4149268                   | <i>ABCA1</i>          | HDL <sup>‡</sup> levels                    | Derived (strong)                            | Derived     |
| rs173539                    | <i>CETP</i>           | HDL levels                                 | Ancestral (moderate)                        | Ancestral   |
| rs7395662                   | <i>MADD, FOLH1</i>    | HDL levels                                 | Ancestral (strong)                          | Ancestral   |
| rs10889353                  | <i>DOCK7</i>          | Total cholesterol levels                   | Ancestral (moderate)                        | Derived     |
| rs3846662                   | <i>HMGCR</i>          | Total cholesterol levels                   | Derived (moderate)                          | Ancestral   |
| rs4939883                   | <i>LIPG</i>           | Total cholesterol levels                   | Ancestral (strong)                          | Derived     |
| rs10913469                  | <i>SEC16B, RASAL2</i> | Weight                                     | Ancestral (strong)                          | Ancestral   |
| rs10838738                  | <i>MTCH2</i>          | BMI                                        | Derived (moderate)                          | Derived     |
| rs1121980                   | <i>FTO</i>            | BMI/obesity                                | Ancestral (moderate)                        | Ancestral   |
| <b>Autoimmune disorders</b> |                       |                                            |                                             |             |
| rs6822844                   | Unknown               | Celiac Disease                             | Derived (moderate)                          | Ancestral   |
| rs660895                    | <i>HLA-DRB1</i>       | Rheumatoid arthritis                       | Derived (strong)                            | Unknown     |
| rs6920220                   | Unknown               | Rheumatoid arthritis                       | Derived (moderate)                          | Unknown     |
| rs12722489                  | <i>IL2RA</i>          | Multiple sclerosis                         | Derived (moderate)                          | Ancestral   |
| rs3129934                   | <i>HLA-DRB1</i>       | Multiple sclerosis                         | Derived (strong)                            | Unknown     |
| rs744166                    | <i>STAT3</i>          | Crohn's Disease                            | Derived (moderate)                          | Derived     |
| rs12708716                  | <i>CLEC16A</i>        | T1D <sup>†</sup>                           | Ancestral (strong)                          | Ancestral   |
| rs2647044                   | <i>HLA-E</i>          | T1D                                        | Ancestral (strong)                          | Ancestral   |
| rs2188962                   | <i>LOC441108</i>      | Crohn's Disease                            | Derived (strong)                            | Derived     |
| rs17696736                  | <i>C12orf30</i>       | T1D                                        | Derived (strong)                            | Derived     |
| rs13015714                  | <i>IL18R1</i>         | Celiac Disease                             | Derived (strong)                            | Derived     |
| rs10210302                  | <i>ATG16L1</i>        | Crohn's Disease                            | Ancestral (moderate)                        | Ancestral   |
| rs17810546                  | <i>IL12A</i>          | Celiac Disease                             | Derived (strong)                            | Derived     |
| rs5743289                   | <i>NOD2</i>           | Inflammatory bowel disease                 | Ancestral (moderate)                        | Ancestral   |
| <b>Melanin synthesis</b>    |                       |                                            |                                             |             |
| rs11855019                  | <i>OCA2</i>           | Blond hair color                           | Derived (strong)                            | Unknown     |
| rs12913832                  | <i>HERC2</i>          | Blond hair color                           | Derived (moderate)                          | Ancestral   |
| rs1408799                   | <i>TYRP1</i>          | Blue eye color                             | Derived (strong)                            | Derived     |
| rs1042602                   | <i>TYR</i>            | Freckles                                   | Derived (moderate)                          | Derived     |
| rs916977                    | <i>HERC2</i>          | Iris color                                 | Derived (strong)                            | Unknown     |
| <b>Cancer</b>               |                       |                                            |                                             |             |
| rs721048                    | <i>EHBP1</i>          | Prostate cancer                            | Derived (moderate)                          | Derived     |
| rs11083846                  | <i>PRKD2</i>          | CLL <sup>§</sup>                           | Derived (moderate)                          | Derived     |
| rs735665                    | <i>GRAMD1B</i>        | CLL                                        | Derived (moderate)                          | Derived     |
| rs872071                    | <i>IRF4</i>           | CLL                                        | Derived (moderate)                          | Derived     |
| rs7538876                   | <i>PADI6</i>          | Cutaneous basal cell carcinoma             | Ancestral (strong)                          | Ancestral   |
| rs3117582                   | <i>BAT3MSH5</i>       | Lung cancer                                | Derived (strong)                            | Unknown     |
| rs10411210                  | <i>RHPN2</i>          | Colorectal cancer                          | Ancestral (moderate)                        | Ancestral   |
| <b>Height</b>               |                       |                                            |                                             |             |
| rs798544                    | <i>GNA12</i>          | Height                                     | Ancestral (moderate)                        | Derived     |
| rs1635852                   | <i>JAZF1</i>          | Height                                     | Derived (moderate)                          | Ancestral   |
| rs6060373                   | <i>GDF5</i>           | Height                                     | Ancestral (moderate)                        | Derived     |
| rs4533267                   | <i>ADAMTS17</i>       | Height                                     | Ancestral (moderate)                        | Ancestral   |
| <b>Other</b>                |                       |                                            |                                             |             |
| rs4128725                   | <i>OR10J1</i>         | MCP1 <sup>¶</sup> levels                   | Derived (strong)                            | Unknown     |
| rs10494366                  | <i>NOS1AP</i>         | QT interval                                | Ancestral (strong)                          | Unknown     |
| rs10496265                  | Unknown               | Aging                                      | Derived (moderate)                          | Unknown     |
| rs4355801                   | <i>TNFRSF11B</i>      | Bone Mineral Density                       | Derived (strong)                            | Ancestral   |
| rs10778213                  | Unknown               | C-reactive protein                         | Derived (moderate)                          | Ancestral   |
| rs1970546                   | <i>CDH4</i>           | Volumetric brain MRI                       | Ancestral (strong)                          | Unknown     |
| rs10958409                  | <i>SOX17</i>          | Intracranial aneurysm                      | Ancestral (moderate)                        | Derived     |
| rs2373115                   | <i>GAB2</i>           | Late-onset Alzheimer's in APOE*ε4 carriers | Derived (moderate)                          | Derived     |

\*Moderate selection is defined as  $1.635 < iHS < 2.0$  and strong selection is defined as  $iHS > 2.0$ .

<sup>†</sup>T1D and T2D: Type 1 and Type 2 Diabetes, respectively

<sup>‡</sup>HDL: High Density Lipoprotein

<sup>§</sup>CLL: Chronic Lymphocytic Leukemia

<sup>¶</sup>MCP1: Monocyte Chemoattractant Protein-1 which is involved in the immune response to injury and infection
